# Supplementary material
Source: Springer Nature journal article supplement (https://www.springermedizin.de/resource/supplementary/13643_2014_328_MOESM17_ESM.pdf/9681736)

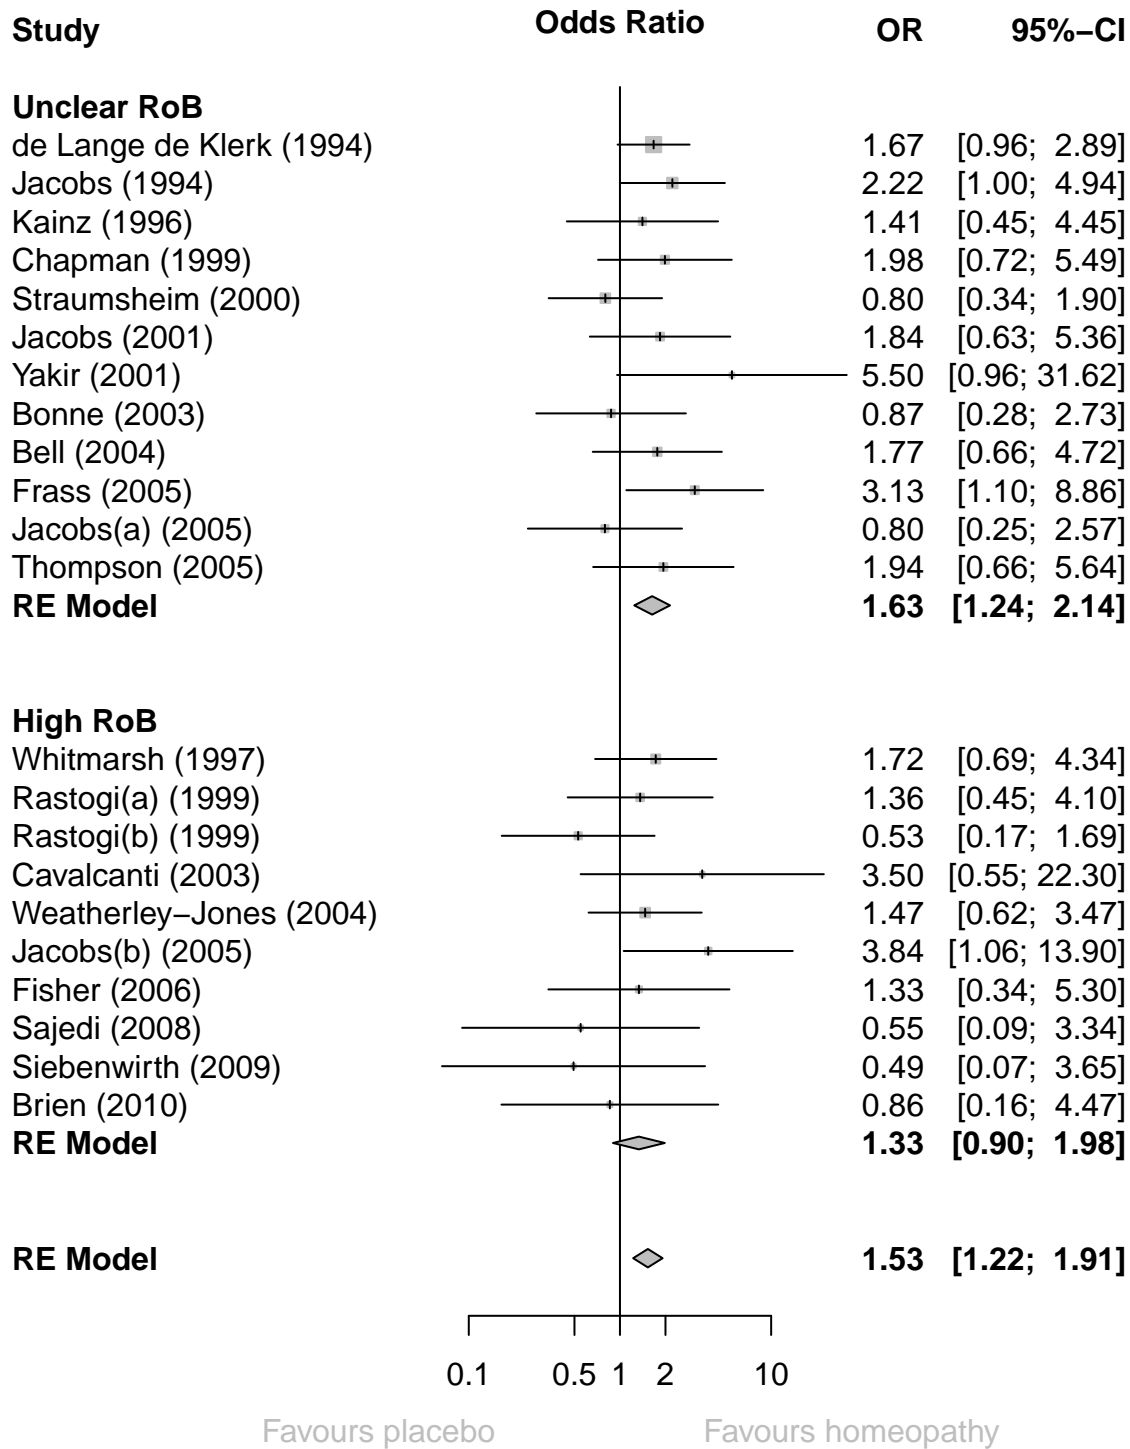

Supplement: MOESM17 [file 9681736]
